# Supplementary material for: Changes in primary metabolites and volatile organic compounds in cotton seedling leaves exposed to silver ions and silver nanoparticles revealed by metabolomic analysis
Source: PeerJ. 2022 Apr 21;10:e13336. doi: 10.7717/peerj.13336 (PMC9035277; doi:10.7717/peerj.13336)
Supplement: Supplemental Information 2 [file peerj-10-13336-s002.xlsx]

## Sheet: nano_diameter
Length
6.093
6.579
7.392
4.072
4.072
6.679
5.122
7.603
6.105
5.193
8.02
7.619
4.489
5.149
7.704
5.162
5.109
5.28
6.349
3.85
9.334
6.241
6.612
4.573
5.304
4.71
3.516
5.57
3.951
4.468
5.485
5.193
6.55
4.162
5.475
4.837
4.187
10.549
5.896
6.622
6.467
3.961
3.001
3.786
5.425
4.489
4.379
3.422
5.896
5.841
7.04
9.119
8.302
5.857
1.62
4.837
4.317
5.27
3.391
5.361
4.112
6.349
4.085
6.529
6.559
6.988
4.43
7.688
8.066
5.079
5.942
4.643
6.33
10.329
4.882
4.608
4.882
8.119
3.497
4.213
5.653
3.981
2.839
10.902
5.738
9.155
8.773
5.659
7.753
5.477
4.658
8.636
6.131
4.84
5.021
3.159
5.165
4.317
7.763
8.32
5.35
5.021
4.885
5.467
5.448
7.958
5.304
6.751
4.773
8.074
5.395
9.726
8.327
3.289

## Sheet: Photosynthetic_pigment
	chlorophyll a	chlorophyll b	carotenoids
CK	4.95483	1.11492	0.889183
	5.03834	1.0284	0.96576
	4.0244	0.984	0.811375
Ag⁺	6.69911	1.88628	1.19478
	6.81835	1.97316	1.23879
	7.79139	2.25252	1.38138
AgNP	7.05645	2.06172	1.14632
	6.34922	1.81368	1.14601
	6.4333	1.85496	1.02393

## Sheet: Biomass
	Leaf	Stem	Root
CK	13.59	3.72	2.44
	13.62	5.14	1.78
	9.67	5.79	2.59
Ag⁺	12.54	5.36	1.56
	12.2	5.91	1.73
	13.62	5.36	2.39
AgNP	11.94	5.82	2.33
	11.4	5	1.72
	13.61	5.91	2.78

## Sheet: Photosynthetic_parameters
	Pn	E	Ci	Gs
CK	4.08658	0.0107985	375.514	0.625065
	4.28851	0.00683964	359.291	0.278044
	4.31635	0.0101094	371.103	0.504332
Ag⁺	4.14964	0.0110167	376.591	0.653651
	4.32597	0.00987109	372.398	0.523476
	4.2605	0.00846854	365.463	0.374481
AgNP	3.41801	0.0100502	374.405	0.505915
	3.60009	0.00920289	372.571	0.45765
	3.45707	0.00856644	369.035	0.377209

## Sheet: Fluorescence_parameters
	qP	Y(NO)	Y(NPQ)
CK	0.748	0.342	0.06
	0.784	0.31	0.07
	0.802	0.307	0.063
Ag⁺	0.819	0.292	0.061
	0.778	0.324	0.057
	0.822	0.297	0.055
AgNP	0.831	0.278	0.054
	0.842	0.28	0.058
	0.811	0.295	0.056
